# Supplementary material
Source: Elsevier journal article supplement (https://www.sciencedirect.com/science/article/pii/S0213925121000198)
Supplement: mmc1 [file S0213925121000198:mmc1.docx]

**Anexo 1:** Diagnósticos específicos agrupados en diagnósticos grupales

| Grupos Diagnósticos | Diagnósticos Específicos |
| --- | --- |
| Acné | Acné |
| Acné inflamatorio |
| Cicatrices de acné |
| Foliculitis |
| Rosácea | Rosácea |
| Rosácea eritematotelangiectásica |
| Rosácea papulopustular |
| Alopecia | Alopecia cicatricial |
| Alopecia no cicatricial |
| Alopecia androgenética |
| Efluvio telógeno |
| Alopecia areata |
| Dermatitis y afines | Dermatitis seborreica |
| Dermatitis atópica |
| Dermatitis de contacto alérgica |
| Dermatitis de contacto irritativa |
| Dermatitis dishidrótica |
| Dishidrosis |
| Dermatitis actínica |
| Dermatitis hipostática |
| Eccema hipostático |
| Eccema numular |
| Fotodermatosis |
| Infecciones bacterianas | Impétigo |
| Ectima |
| Foliculitis bacteriana |
| Forúnculo y ántrax |
| Celulitis |
| Paroniquia |
| Felón |
| Dactilitis ampollosa distal |
| Eritrasma |
| Queratólisis punctata |
| Micosis | Tiña |
| Tinea capitis |
| Tinea corporis |
| Tinea cruris |
| Tiña de la barba |
| Tinea manum |
| Tinea pedis |
| Granuloma de Majocchi |
| Tiña incógnita |
| Pitiriasis versicolor |
| Foliculitis fúngica |
| Candidiasis oral |
| Intertrigo |
| Vulvovaginitis |
| Balanitis |
| Onicomicosis |
| Micosis |
| Infecciones víricas | Verrugas comunes |
| Verrugas filiformes |
| Verrugas planas |
| Verrugas palmoplantares |
| Gingivoestomatitis herpética |
| Herpes labial |
| Herpes simple |
| Herpes |
| Panadizo herpético |
| Eccema herpético |
| Eritema multiforme |
| Varicela |
| Herpes Zoster |
| Molusco contagioso |
| Molusco |
| Enfermedades eritematoescamosas | Psoriasis |
| Liquen plano |
| Liquen ruber plano |
| Liquen |
| Liquen simple crónico |
| Neurodermitis |
| Neurodermatitis |
| Pitiriasis rubra pilaris |
| Pityriasis lichenoides et varioliformis acuta (PLEVA) |
| Trastornos de hiperpigmentación | Melasma |
| Hiperpigmentación postinflamatoria |
| Eritema discrómico perstans |
| Erupción fija medicamentosa |
| Enfermedad de Addison |
| Melanosis facial |
| Vitíligo |
| Trastornos hipocrómicos | Vitíligo |
| Hipo pigmentación postinflamatoria |
| Halo nevus |
| Pitiriasis alba |
| Tumores epidérmicos benignos | Queratosis seborreica |
| Queratosis liquenoide |
| Acantoma de células claras |
| Nevo epidérmico |
| Quistes de revestimiento epidérmico | Quiste epidérmico |
| Quiste triquilemal |
| Quiste dermoide |
| Esteatocistoma |
| Tumores benignos | Tricoepitelioma |
| Hidrocistomas |
| Cilindroma |
| Dermatofibromas |
| Hiperplasia sebácea |
| Adenoma sebáceo |
| Granuloma telangiectásico |
| Granuloma piógeno |
| Hemangiomas cereza |
| Lipoma |
| Angioqueratoma |
| Angiolipoma |
| Tumor glómico |
| Fibroma blando |
| Lentigo solar |
| Lentigo |
| Neurofibroma |
| Hemangiomas de la infancia |
| Hemangioma |
| Hemangiomatosis neonatal |
| Xantogranuloma |
| Xantelasma |
| Nevo sebáceo |
| Tumores malignos epiteliales | Carcinoma de células basales |
| Queratosis actínica |
| Enfermedad de Bowen |
| Carcinoma de células escamosas |
| Queratoacantoma |
| Tumores malignos no epiteliales | Carcinoma de células de Merkel |
| Dermatofibrosarcoma protuberans |
| Tumores melanocíticos malignos | Melanoma |
| Lentigo maligno |
| Nevos melanocíticos | Nevo azul |
| Nevos melanocíticos intradérmicos |
| Nevo melanocítico |
| Nevo verrucoso |
| Nevus |
| Nevos |
| Nevo melanocítico atípico |
| Mancha mongólica |
| Nevo melanocítico que requiere atención especializada |
| Enfermedades parasitarias | Sarna |
| Pediculosis |
| Loxocelismo |
| Enfermedades autoinmunes | Morfea |
| Lupus cutáneo |
| Lupus sistémico |
| Vasculitis |
| Paniculitis |
| Dermatomiositis |
| Enfermedades inflamatorias | Hidradenitis supurativa |
| Alteraciones ungueales | Distrofia ungueal |
| Trastorno de glándulas sudoríparas | Hiperhidrosis |
| Malformaciones vasculares | Malformación vascular |
| Nevus flammeus |
| Telangiectasia |
| Lago venoso |
| Otros | Urticaria aguda |
| Urticaria crónica |
| Dermografía |
| Prurigo insectario |
| Prurigo agudo |
| Prurigo |
| Queratosis pilaris |
| Queratosis folicular |
| Queratosis pilosa roja de la cara |
| Acropustulosis |
| Cicatriz |
| Queloide |
| Cicatriz hipertrófica |
| Queratodermia |
| Hiperqueratosis |
| Xerosis |
| Dermatosis purpúrica pigmentada |
| Venas varicosas |
| Eritrosis facial |
| Granuloma anular |
| Cheilitis |
| Papilomatosis reticulada de Gougerot-Carteaud |
| Hematoma subungueal |
| Aplasia cutis |
| Amiloidosis macular |
| Glositis |
| Estrías |
